# Supplementary material for: A Study of Blood Fatty Acids Profile in Hyperlipidemic and Normolipidemic Subjects in Association with Common PNPLA3 and ABCB1 Polymorphisms
Source: PubMed Central journal article supplement (PMC7915980; doi:10.3390/metabo11020090), 2021-02-04
Supplement: metabolites-11-00090-s001.pdf [file metabolites-11-00090-s001.pdf]

SUPPLEMENTARY MATERIAL

Table S1. FA concentrations in individual samples.

| CONTROL | C14:0 | C15:0 | C15:1 | C16:0 | C16:1 | C17:0 | C17:1 | C18:0 | C18:1cis | C18:2cis | C20:0 | C20:1n9 | C20:2 | C20:3n6 | C20:4n6 | C20:5 | C23:0 | C24:0 | C24:1 | C22:6 | SUM  |
|---------|-------|-------|-------|-------|-------|-------|-------|-------|----------|----------|-------|---------|-------|---------|---------|-------|-------|-------|-------|-------|------|
| 1       | 0.12  | 0.02  | 0.09  | 1.53  | 0.22  | 0.03  | 0.40  | 0.72  | 1.46     | 0.53     | 0.01  | 0.02    | 0.07  | 0.11    | 0.39    | 0.15  | 0.03  | 0.05  | 0.10  | 0.06  | 6.11 |
| 2       | 0.03  | 0.01  | 0.05  | 0.58  | 0.05  | 0.02  | 0.22  | 0.29  | 0.50     | 0.31     | 0.01  | 0.01    | 0.07  | 0.07    | 0.43    | 0.10  | 0.02  | 0.03  | 0.05  | 0.05  | 2.89 |
| 3       | 0.01  | 0.01  | 0.03  | 0.50  | 0.03  | 0.01  | 0.15  | 0.26  | 0.32     | 0.17     | 0.01  | 0.01    | 0.06  | 0.03    | 0.40    | 0.06  | 0.02  | 0.02  | 0.03  | 0.02  | 2.14 |
| 4       | 0.02  | 0.01  | 0.05  | 0.62  | 0.04  | 0.01  | 0.19  | 0.34  | 0.46     | 0.26     | 0.01  | 0.01    | 0.06  | 0.07    | 0.40    | 0.12  | 0.03  | 0.04  | 0.07  | 0.03  | 2.83 |
| 5       | 0.06  | 0.01  | 0.06  | 0.53  | 0.02  | 0.02  | 0.31  | 0.33  | 0.39     | 0.34     | 0.01  | 0.01    | 0.06  | 0.07    | 0.40    | 0.08  | 0.03  | 0.03  | 0.08  | 0.10  | 2.95 |
| 6       | 0.03  | 0.01  | 0.06  | 0.89  | 0.07  | 0.02  | 0.25  | 0.44  | 0.60     | 0.34     | 0.01  | 0.01    |       | 0.09    | 0.32    | 0.18  | 0.04  | 0.07  | 0.09  | 0.04  | 3.55 |
| 7       | 0.05  | 0.01  | 0.06  | 0.72  | 0.05  | 0.02  | 0.30  | 0.36  | 0.60     | 0.37     | 0.01  | 0.01    | 0.07  | 0.07    | 0.36    | 0.11  | 0.03  | 0.05  | 0.08  | 0.04  | 3.34 |
| 8       | 0.05  | 0.01  | 0.04  | 0.68  | 0.07  | 0.02  | 0.19  | 0.36  | 0.65     | 0.26     | 0.01  | 0.02    |       | 0.10    | 0.44    | 0.12  | 0.03  | 0.05  | 0.07  | 0.13  | 3.24 |
| 9       | 0.04  | 0.02  | 0.06  | 0.86  | 0.11  | 0.02  | 0.25  | 0.42  | 0.72     | 0.34     | 0.01  | 0.01    | 0.06  | 0.12    | 0.46    | 0.13  | 0.04  | 0.05  | 0.08  | 0.05  | 3.86 |
| 10      | 0.04  | 0.01  | 0.05  | 0.63  | 0.03  | 0.02  | 0.22  | 0.38  | 0.36     | 0.28     | 0.01  | 0.01    |       | 0.06    | 0.45    | 0.12  | 0.03  | 0.05  | 0.05  | 0.03  | 2.81 |
| 11      | 0.07  | 0.01  | 0.10  | 0.61  | 0.04  | 0.01  | 0.41  | 0.35  | 0.36     | 0.32     | 0.01  | 0.01    |       | 0.08    | 0.39    | 0.12  | 0.03  | 0.05  | 0.08  | 0.08  | 3.13 |
| 12      | 0.09  | 0.01  | 0.05  | 0.72  | 0.04  | 0.02  | 0.24  | 0.33  | 0.56     | 0.36     | 0.01  | 0.01    | 0.07  | 0.09    | 0.46    | 0.13  | 0.04  | 0.04  | 0.06  | 0.05  | 3.37 |
| 13      | 0.10  | 0.02  | 0.06  | 0.89  | 0.05  | 0.02  | 0.31  | 0.52  | 0.95     | 0.45     | 0.01  | 0.02    |       | 0.11    | 0.38    |       | 0.04  | 0.04  | 0.08  | 0.05  | 4.09 |
| 14      | 0.07  | 0.01  | 0.06  | 1.15  | 0.13  | 0.02  | 0.23  | 0.58  | 0.77     | 0.29     | 0.01  | 0.02    |       | 0.08    | 0.32    |       | 0.02  | 0.04  | 0.07  | 0.07  | 3.94 |
| 15      | 0.15  | 0.01  | 0.08  | 0.88  | 0.08  | 0.01  | 0.30  | 0.54  | 0.51     | 0.28     | 0.02  | 0.02    |       | 0.10    | 0.36    |       | 0.03  | 0.05  | 0.07  | 0.04  | 3.51 |
| 16      | 0.04  | 0.01  | 0.02  | 0.61  | 0.07  | 0.01  | 0.11  | 0.26  | 0.61     | 0.16     | 0.01  | 0.01    | 0.07  | 0.06    | 0.40    | 0.06  | 0.01  | 0.03  | 0.04  | 0.02  | 2.62 |
| 17      | 0.01  | 0.01  | 0.06  | 0.59  | 0.03  | 0.02  | 0.33  | 0.33  | 0.41     | 0.34     | 0.01  | 0.01    |       | 0.08    | 0.41    | 0.12  | 0.03  | 0.05  | 0.07  | 0.04  | 2.94 |
| 18      | 0.04  | 0.01  | 0.05  | 0.49  | 0.04  | 0.01  | 0.22  | 0.25  | 0.34     | 0.22     | 0.01  | 0.01    |       | 0.08    | 0.41    | 0.10  | 0.03  | 0.04  | 0.05  | 0.03  | 2.41 |
| 19      | 0.04  | 0.01  | 0.06  | 0.79  | 0.06  | 0.02  | 0.27  | 0.43  | 0.62     | 0.34     | 0.01  | 0.01    |       | 0.09    | 0.43    | 0.12  | 0.03  | 0.05  | 0.07  | 0.08  | 3.53 |
| 20      | 0.02  | 0.01  | 0.05  | 0.57  | 0.04  | 0.02  | 0.27  | 0.35  | 0.55     | 0.35     | 0.01  | 0.01    | 0.06  | 0.11    | 0.43    | 0.11  | 0.04  | 0.04  | 0.07  | 0.08  | 3.18 |
| 21      | 0.07  | 0.02  | 0.09  | 0.85  | 0.06  | 0.03  | 0.36  | 0.47  | 0.76     | 0.67     | 0.01  | 0.01    | 0.06  | 0.15    | 0.42    | 0.16  | 0.05  | 0.05  | 0.07  | 0.10  | 4.47 |
| 22      | 0.07  | 0.01  | 0.05  | 0.62  | 0.06  | 0.02  | 0.26  | 0.30  | 0.63     | 0.31     | 0.01  | 0.01    | 0.07  | 0.10    | 0.42    | 0.06  | 0.01  | 0.02  | 0.05  | 0.05  | 3.15 |
| 23      | 0.08  | 0.01  | 0.03  | 0.41  | 0.03  | 0.02  | 0.13  | 0.19  | 0.38     | 0.13     | 0.01  | 0.01    |       | 0.06    | 0.41    | 0.06  | 0.02  | 0.03  | 0.05  | 0.02  | 2.08 |
| 24      | 0.07  | 0.01  | 0.07  | 0.65  | 0.04  | 0.02  | 0.30  | 0.39  | 0.40     | 0.51     | 0.01  | 0.01    |       | 0.11    | 0.42    | 0.12  | 0.03  | 0.04  | 0.05  | 0.04  | 3.31 |
| 25      | 0.06  | 0.01  | 0.02  | 0.33  | 0.01  | 0.01  | 0.12  | 0.19  | 0.35     | 0.16     | 0.00  | 0.00    |       | 0.03    | 0.38    | 0.05  | 0.02  | 0.02  | 0.04  | 0.02  | 1.83 |
| 26      | 0.04  | 0.01  | 0.07  | 0.57  | 0.05  | 0.01  | 0.32  | 0.32  | 0.40     | 0.19     | 0.01  | 0.01    |       | 0.06    | 0.46    | 0.09  | 0.02  | 0.04  | 0.06  | 0.07  | 2.78 |
| 27      | 0.05  | 0.01  | 0.06  | 0.82  | 0.04  | 0.02  | 0.32  | 0.55  | 0.57     | 0.62     | 0.01  | 0.01    |       | 0.13    | 0.41    | 0.12  | 0.02  | 0.05  | 0.07  | 0.05  | 3.93 |
| 28      | 0.03  | 0.01  | 0.08  | 0.51  | 0.04  | 0.01  | 0.40  | 0.35  | 0.45     | 0.30     | 0.01  | 0.01    | 0.07  | 0.11    | 0.52    | 0.13  | 0.03  | 0.04  | 0.08  | 0.06  | 3.26 |
| 29      | 0.14  | 0.02  | 0.04  | 0.87  | 0.02  | 0.02  | 0.16  | 0.53  | 0.47     | 0.33     | 0.01  | 0.01    |       | 0.11    | 0.35    |       | 0.03  | 0.04  | 0.05  | 0.04  | 3.24 |
| 30      | 0.09  | 0.03  | 0.10  | 1.25  | 0.08  | 0.03  | 0.30  | 0.76  | 0.84     | 0.65     | 0.01  | 0.01    |       | 0.20    | 0.46    | 0.04  | 0.03  | 0.05  | 0.05  | 0.09  | 5.07 |
| 31      | 0.10  | 0.02  | 0.06  | 1.08  | 0.09  | 0.03  | 0.28  | 0.72  | 0.74     | 0.31     | 0.01  | 0.01    |       | 0.13    | 0.38    |       | 0.02  | 0.05  | 0.07  | 0.04  | 4.12 |
| 32      | 0.06  | 0.01  | 0.06  | 0.59  | 0.06  | 0.01  | 0.28  | 0.31  | 0.33     | 0.26     | 0.01  | 0.01    | 0.06  | 0.07    | 0.44    | 0.11  | 0.01  | 0.04  | 0.06  | 0.05  | 2.81 |
| 33      | 0.04  | 0.01  | 0.05  | 0.71  | 0.04  | 0.02  | 0.22  | 0.37  | 0.53     | 0.24     | 0.01  | 0.01    |       | 0.07    | 0.41    | 0.12  | 0.03  | 0.05  | 0.06  | 0.04  | 3.04 |
| 34      | 0.03  | 0.01  | 0.04  | 0.42  | 0.02  | 0.02  | 0.18  | 0.27  | 0.32     | 0.25     | 0.01  | 0.01    |       | 0.07    | 0.38    | 0.07  | 0.02  | 0.02  | 0.04  | 0.04  | 2.22 |
| 35      | 0.02  | 0.01  | 0.07  | 0.61  | 0.04  | 0.02  | 0.35  | 0.39  | 0.45     | 0.37     | 0.01  | 0.01    | 0.07  | 0.11    | 0.37    | 0.11  | 0.02  | 0.04  | 0.07  | 0.03  | 3.17 |

|           |      |      |      |      |      |      |      |      |      |      |      |      |      |      |      |      |      |      |      |      |      |
|-----------|------|------|------|------|------|------|------|------|------|------|------|------|------|------|------|------|------|------|------|------|------|
| <b>36</b> | 0.03 | 0.01 | 0.04 | 0.62 | 0.08 | 0.01 | 0.17 | 0.31 | 0.41 | 0.26 | 0.01 | 0.01 | 0.07 | 0.10 | 0.34 | 0.10 | 0.03 | 0.03 | 0.05 | 0.03 | 2.71 |
| <b>37</b> | 0.05 | 0.01 | 0.03 | 0.74 | 0.09 | 0.01 | 0.15 | 0.42 | 0.68 | 0.23 | 0.01 | 0.01 |      | 0.09 | 0.31 | 0.10 | 0.03 | 0.04 | 0.06 | 0.03 | 3.09 |
| <b>38</b> | 0.03 | 0.01 | 0.04 | 0.62 | 0.05 | 0.01 | 0.16 | 0.32 | 0.33 | 0.25 | 0.01 | 0.01 | 0.06 | 0.07 | 0.39 | 0.11 | 0.03 | 0.04 | 0.06 | 0.02 | 2.63 |
| <b>39</b> | 0.03 | 0.01 | 0.07 | 0.64 | 0.04 | 0.01 | 0.34 | 0.35 | 0.47 | 0.29 | 0.01 | 0.01 |      | 0.09 | 0.36 | 0.11 | 0.03 | 0.04 | 0.08 | 0.07 | 3.03 |
| <b>40</b> | 0.03 | 0.01 | 0.07 | 0.61 | 0.04 | 0.01 | 0.31 | 0.33 | 0.45 | 0.28 | 0.01 | 0.01 | 0.06 | 0.09 | 0.44 | 0.11 | 0.02 | 0.04 | 0.07 | 0.05 | 3.04 |
| <b>41</b> | 0.03 | 0.01 | 0.10 | 0.76 | 0.04 | 0.02 | 0.47 | 0.55 | 0.56 | 0.39 | 0.01 | 0.01 | 0.06 | 0.12 | 0.41 | 0.14 | 0.03 | 0.05 | 0.08 | 0.09 | 3.95 |
| <b>42</b> | 0.04 | 0.01 | 0.08 | 0.63 | 0.03 | 0.02 | 0.43 | 0.39 | 0.49 | 0.36 | 0.01 | 0.01 |      | 0.09 | 0.48 | 0.13 | 0.04 | 0.04 | 0.08 | 0.08 | 3.43 |

| <b>HYPERLIPIDEMICS</b> | <b>C14:0</b> | <b>C15:0</b> | <b>C15:1</b> | <b>C16:0</b> | <b>C16:1</b> | <b>C17:0</b> | <b>C17:1</b> | <b>C18:0</b> | <b>C18:1cis</b> | <b>C18:2cis</b> | <b>C20:0</b> | <b>C20:1n9</b> | <b>C20:2</b> | <b>C20:3n6</b> | <b>C20:4n6</b> | <b>C20:5</b> | <b>C23:0</b> | <b>C24:0</b> | <b>C24:1</b> | <b>C22:6</b> | <b>SUM</b>  |
|------------------------|--------------|--------------|--------------|--------------|--------------|--------------|--------------|--------------|-----------------|-----------------|--------------|----------------|--------------|----------------|----------------|--------------|--------------|--------------|--------------|--------------|-------------|
| <b>1</b>               | 0.09         | 0.02         | 0.07         | 0.94         | 0.06         | 0.02         | 0.34         | 0.49         | 0.62            | 0.36            | 0.01         | 0.01           | 0.06         | 0.12           | 0.39           | 0.10         | 0.02         | 0.04         | 0.07         | 0.08         | <b>3.93</b> |
| <b>2</b>               | 0.11         | 0.02         | 0.08         | 1.03         | 0.06         | 0.03         | 0.37         | 0.62         | 0.83            | 0.41            | 0.01         | 0.01           | 0.07         | 0.11           | 0.44           | 0.13         | 0.03         | 0.05         | 0.09         | 0.10         | <b>4.60</b> |
| <b>3</b>               | 0.12         | 0.02         | 0.05         | 1.22         | 0.11         | 0.03         | 0.25         | 0.56         | 0.96            | 0.49            | 0.01         | 0.01           |              | 0.12           | 0.38           | 0.12         | 0.04         | 0.04         | 0.05         | 0.06         | <b>4.64</b> |
| <b>4</b>               | 0.07         | 0.01         | 0.03         | 0.55         | 0.03         | 0.01         | 0.14         | 0.30         | 0.52            | 0.35            | 0.01         | 0.02           |              | 0.08           | 0.34           | 0.06         | 0.03         | 0.02         | 0.03         | 0.03         | <b>2.62</b> |
| <b>5</b>               | 0.07         | 0.01         | 0.08         | 1.07         | 0.04         | 0.02         | 0.42         | 0.64         | 1.10            | 0.61            | 0.01         | 0.01           | 0.06         | 0.13           | 0.42           | 0.12         | 0.04         | 0.04         | 0.07         | 0.18         | <b>5.15</b> |
| <b>6</b>               | 0.08         | 0.01         | 0.05         | 1.25         | 0.09         | 0.02         | 0.25         | 0.48         | 0.97            | 0.39            | 0.02         | 0.01           | 0.06         | 0.06           | 0.33           | 0.11         | 0.02         | 0.03         | 0.05         | 0.04         | <b>4.33</b> |
| <b>7</b>               | 0.11         | 0.02         | 0.08         | 1.36         | 0.11         | 0.02         | 0.36         | 0.52         | 1.02            | 0.53            | 0.01         | 0.02           | 0.06         | 0.10           | 0.41           | 0.07         | 0.01         | 0.03         | 0.06         | 0.08         | <b>5.00</b> |
| <b>8</b>               | 0.17         | 0.03         | 0.06         | 1.20         | 0.11         | 0.03         | 0.31         | 0.56         | 0.88            | 0.43            | 0.01         | 0.01           | 0.07         | 0.08           | 0.35           | 0.13         | 0.02         | 0.05         | 0.07         | 0.02         | <b>4.57</b> |
| <b>9</b>               | 0.09         | 0.03         | 0.06         | 1.34         | 0.11         | 0.03         | 0.29         | 0.59         | 1.18            | 0.59            | 0.01         | 0.02           | 0.07         | 0.23           | 0.48           | 0.13         | 0.05         | 0.04         | 0.06         | 0.06         | <b>5.46</b> |
| <b>10</b>              | 0.15         | 0.01         | 0.01         | 0.93         | 0.05         | 0.02         | 0.25         | 0.51         | 0.60            | 0.45            | 0.01         | 0.01           | 0.07         | 0.11           | 0.37           | 0.11         | 0.02         | 0.03         | 0.05         | 0.07         | <b>3.86</b> |
| <b>11</b>              | 0.09         | 0.01         | 0.08         | 0.78         | 0.05         | 0.01         | 0.39         | 0.46         | 0.63            | 0.59            | 0.01         | 0.01           | 0.06         | 0.14           | 0.43           | 0.10         | 0.03         | 0.04         | 0.06         | 0.13         | <b>4.11</b> |
| <b>12</b>              | 0.10         | 0.02         | 0.07         | 1.07         | 0.09         | 0.02         | 0.29         | 0.51         | 0.77            | 0.56            | 0.01         | 0.01           | 0.07         | 0.14           | 0.40           | 0.12         | 0.04         | 0.04         | 0.05         | 0.07         | <b>4.43</b> |
| <b>13</b>              | 0.13         | 0.02         | 0.05         | 1.21         | 0.13         | 0.03         | 0.25         | 0.61         | 1.35            | 0.37            | 0.01         | 0.02           | 0.07         | 0.12           | 0.37           | 0.10         | 0.04         | 0.03         | 0.06         | 0.03         | <b>5.01</b> |
| <b>14</b>              | 0.09         | 0.01         | 0.05         | 0.68         | 0.03         | 0.02         | 0.24         | 0.38         | 0.38            | 0.31            | 0.01         | 0.01           | 0.07         | 0.07           | 0.34           | 0.11         | 0.03         | 0.03         | 0.04         | 0.03         | <b>2.92</b> |
| <b>15</b>              | 0.12         | 0.01         | 0.04         | 0.57         | 0.04         | 0.01         | 0.15         | 0.34         | 0.53            | 0.28            | 0.01         | 0.01           | 0.06         | 0.08           | 0.32           | 0.09         | 0.03         | 0.03         | 0.06         | 0.08         | <b>2.86</b> |
| <b>16</b>              | 0.09         | 0.01         | 0.04         | 0.86         | 0.06         | 0.02         | 0.19         | 0.46         | 0.71            | 0.16            | 0.01         | 0.01           | 0.06         | 0.06           | 0.33           | 0.09         | 0.02         | 0.04         | 0.07         | 0.03         | <b>3.34</b> |
| <b>17</b>              | 0.06         | 0.01         | 0.04         | 0.77         | 0.07         | 0.01         | 0.18         | 0.36         | 0.64            | 0.33            | 0.01         | 0.01           |              | 0.12           | 0.31           | 0.07         | 0.02         | 0.03         | 0.05         | 0.05         | <b>3.15</b> |
| <b>18</b>              | 0.09         | 0.01         | 0.05         | 0.60         | 0.03         | 0.02         | 0.20         | 0.34         | 0.47            | 0.25            | 0.01         | 0.01           | 0.06         | 0.06           | 0.32           | 0.12         | 0.04         | 0.04         | 0.06         | 0.03         | <b>2.82</b> |
| <b>19</b>              | 0.05         | 0.00         | 0.04         | 0.40         | 0.05         | 0.01         | 0.17         | 0.25         | 0.38            | 0.16            | 0.00         | 0.01           |              | 0.05           | 0.33           | 0.06         | 0.02         | 0.03         | 0.04         | 0.04         | <b>2.09</b> |
| <b>20</b>              | 0.10         | 0.01         | 0.04         | 0.63         | 0.11         | 0.01         | 0.22         | 0.31         | 0.60            | 0.28            | 0.01         | 0.01           | 0.06         | 0.15           | 0.34           | 0.07         | 0.02         | 0.03         | 0.04         | 0.08         | <b>3.13</b> |
| <b>21</b>              | 0.10         | 0.01         | 0.03         | 0.73         | 0.05         | 0.01         | 0.16         | 0.29         | 0.64            | 0.31            | 0.01         | 0.01           | 0.07         | 0.05           | 0.31           | 0.08         | 0.02         | 0.03         | 0.04         | 0.04         | <b>3.00</b> |
| <b>22</b>              | 0.15         | 0.01         | 0.05         | 0.76         | 0.05         | 0.01         | 0.23         | 0.38         | 0.63            | 0.34            | 0.01         | 0.01           | 0.06         | 0.06           | 0.35           | 0.10         | 0.02         | 0.04         | 0.06         | 0.05         | <b>3.40</b> |
| <b>23</b>              | 0.12         | 0.02         | 0.06         | 0.93         | 0.08         | 0.03         | 0.28         | 0.46         | 0.65            | 0.64            | 0.01         | 0.01           | 0.06         | 0.14           | 0.40           | 0.10         | 0.03         | 0.03         | 0.04         | 0.11         | <b>4.19</b> |
| <b>24</b>              | 0.10         | 0.01         | 0.03         | 0.55         | 0.07         | 0.01         | 0.12         | 0.27         | 0.39            | 0.18            | 0.01         | 0.01           | 0.07         | 0.08           | 0.29           | 0.07         | 0.02         | 0.03         | 0.03         | 0.03         | <b>2.36</b> |
| <b>25</b>              | 0.07         | 0.01         | 0.03         | 0.56         | 0.05         | 0.02         | 0.15         | 0.29         | 0.47            | 0.20            | 0.01         | 0.01           | 0.06         | 0.05           | 0.31           | 0.07         | 0.02         | 0.03         | 0.03         | 0.06         | <b>2.49</b> |
| <b>26</b>              | 0.09         | 0.01         | 0.05         | 0.65         | 0.05         | 0.01         | 0.25         | 0.36         | 0.55            | 0.25            | 0.01         | 0.01           | 0.06         | 0.05           | 0.32           | 0.07         | 0.02         | 0.03         | 0.05         | 0.03         | <b>2.94</b> |
| <b>27</b>              | 0.08         | 0.03         | 0.08         | 1.20         | 0.20         | 0.02         | 0.33         | 0.67         | 1.01            | 0.74            | 0.01         | 0.02           | 0.06         | 0.32           | 0.51           | 0.04         | 0.05         | 0.04         | 0.05         | 0.08         | <b>5.53</b> |
| <b>28</b>              | 0.08         | 0.01         | 0.05         | 1.01         | 0.09         | 0.02         | 0.23         | 0.52         | 1.01            | 0.50            | 0.01         | 0.01           | 0.06         | 0.13           | 0.39           | 0.02         | 0.04         | 0.05         | 0.08         | 0.07         | <b>4.40</b> |
| <b>29</b>              | 0.05         | 0.01         | 0.05         | 0.73         | 0.07         | 0.01         | 0.30         | 0.38         | 0.76            | 0.45            | 0.01         | 0.01           |              | 0.10           | 0.35           | 0.09         | 0.02         | 0.03         | 0.04         | 0.05         | <b>3.52</b> |
| <b>30</b>              | 0.09         | 0.02         | 0.08         | 1.02         | 0.11         | 0.03         | 0.37         | 0.54         | 0.68            | 0.63            | 0.01         | 0.01           | 0.07         | 0.12           | 0.41           | 0.10         | 0.04         | 0.04         | 0.05         | 0.09         | <b>4.50</b> |

|           |      |      |      |      |      |      |      |      |      |      |      |      |      |      |      |      |      |      |      |      |             |
|-----------|------|------|------|------|------|------|------|------|------|------|------|------|------|------|------|------|------|------|------|------|-------------|
| <b>31</b> | 0.08 | 0.02 | 0.07 | 1.13 | 0.08 | 0.03 | 0.35 | 0.46 | 1.09 | 0.60 | 0.01 | 0.01 | 0.07 | 0.09 | 0.43 | 0.11 | 0.04 | 0.04 | 0.07 | 0.10 | <b>4.88</b> |
| <b>32</b> | 0.06 | 0.01 | 0.04 | 0.61 | 0.05 | 0.02 | 0.20 | 0.32 | 0.43 | 0.29 | 0.01 | 0.01 | 0.07 | 0.08 | 0.35 | 0.09 | 0.03 | 0.04 | 0.05 | 0.05 | <b>2.79</b> |
| <b>33</b> | 0.08 | 0.02 | 0.04 | 0.79 | 0.10 | 0.02 | 0.22 | 0.37 | 0.80 | 0.43 | 0.01 | 0.01 | 0.06 | 0.11 | 0.39 | 0.08 | 0.02 | 0.03 | 0.05 | 0.08 | <b>3.71</b> |
| <b>34</b> | 0.08 | 0.01 | 0.05 | 0.92 | 0.07 | 0.02 | 0.26 | 0.41 | 0.76 | 0.28 | 0.01 | 0.01 | 0.06 | 0.08 | 0.34 | 0.13 | 0.03 | 0.05 | 0.06 | 0.03 | <b>3.67</b> |
| <b>35</b> | 0.09 | 0.01 | 0.07 | 0.75 | 0.09 | 0.02 | 0.32 | 0.42 | 0.70 | 0.55 | 0.01 | 0.01 | 0.06 | 0.14 | 0.40 | 0.07 | 0.02 | 0.03 | 0.05 | 0.09 | <b>3.90</b> |
| <b>36</b> | 0.08 | 0.01 | 0.07 | 0.94 | 0.08 | 0.02 | 0.31 | 0.45 | 0.79 | 0.41 | 0.01 | 0.01 |      | 0.11 | 0.39 | 0.12 | 0.02 | 0.05 | 0.06 | 0.09 | <b>4.02</b> |
| <b>37</b> | 0.09 | 0.01 | 0.04 | 0.89 | 0.06 | 0.02 | 0.20 | 0.38 | 0.78 | 0.29 | 0.01 | 0.01 | 0.07 | 0.06 | 0.31 | 0.10 | 0.02 | 0.04 | 0.05 | 0.02 | <b>3.45</b> |
| <b>38</b> | 0.08 | 0.01 | 0.04 | 0.75 | 0.08 | 0.02 | 0.14 | 0.35 | 0.56 | 0.37 | 0.01 | 0.01 | 0.06 | 0.09 | 0.33 | 0.12 | 0.03 | 0.04 | 0.05 | 0.05 | <b>3.18</b> |
| <b>39</b> | 0.06 | 0.02 | 0.06 | 0.89 | 0.06 | 0.02 | 0.26 | 0.42 | 0.71 | 0.38 | 0.01 | 0.01 | 0.06 | 0.08 | 0.39 | 0.14 | 0.04 | 0.05 | 0.08 | 0.06 | <b>3.80</b> |
| <b>40</b> | 0.14 | 0.02 | 0.09 | 1.01 | 0.10 | 0.02 | 0.37 | 0.46 | 0.73 | 0.57 | 0.01 | 0.01 |      | 0.15 | 0.40 | 0.12 | 0.03 | 0.05 | 0.06 | 0.09 | <b>4.43</b> |
| <b>41</b> | 0.06 | 0.01 | 0.06 | 0.77 | 0.06 | 0.02 | 0.33 | 0.37 | 0.70 | 0.33 | 0.01 | 0.01 | 0.07 | 0.12 | 0.38 | 0.09 | 0.02 | 0.05 | 0.07 | 0.07 | <b>3.60</b> |
| <b>42</b> | 0.11 | 0.01 | 0.05 | 0.82 | 0.04 | 0.02 | 0.34 | 0.37 | 0.64 | 0.49 | 0.01 | 0.01 | 0.06 | 0.06 | 0.44 | 0.09 | 0.03 | 0.04 | 0.04 | 0.07 | <b>3.73</b> |
| <b>43</b> | 0.14 | 0.02 | 0.05 | 1.33 | 0.17 | 0.03 | 0.24 | 0.56 | 1.02 | 0.47 | 0.01 | 0.01 | 0.07 | 0.17 | 0.37 | 0.16 | 0.04 | 0.05 | 0.07 | 0.05 | <b>5.02</b> |
| <b>44</b> | 0.07 | 0.01 | 0.09 | 0.82 | 0.06 | 0.02 | 0.41 | 0.49 | 0.73 | 0.45 | 0.01 | 0.01 | 0.07 | 0.11 | 0.43 | 0.11 | 0.03 | 0.05 | 0.06 | 0.07 | <b>4.09</b> |
| <b>45</b> | 0.06 | 0.01 | 0.04 | 0.66 | 0.05 | 0.02 | 0.18 | 0.37 | 0.50 | 0.32 | 0.01 | 0.01 | 0.07 | 0.10 | 0.37 | 0.09 | 0.03 | 0.04 | 0.06 | 0.06 | <b>3.03</b> |
| <b>46</b> | 0.05 | 0.01 | 0.05 | 0.80 | 0.05 | 0.01 | 0.23 | 0.31 | 0.59 | 0.31 | 0.01 | 0.01 | 0.06 | 0.05 | 0.35 | 0.09 | 0.03 | 0.05 | 0.08 | 0.08 | <b>3.23</b> |
| <b>47</b> | 0.12 | 0.03 | 0.08 | 1.15 | 0.11 | 0.03 | 0.30 | 0.54 | 1.20 | 0.69 | 0.01 | 0.01 |      | 0.22 | 0.43 | 0.11 | 0.04 | 0.04 | 0.07 | 0.18 | <b>5.35</b> |
| <b>48</b> | 0.05 | 0.01 | 0.07 | 0.91 | 0.08 | 0.01 | 0.32 | 0.46 | 0.79 | 0.38 | 0.01 | 0.01 |      | 0.13 | 0.39 | 0.03 | 0.03 | 0.04 | 0.05 | 0.14 | <b>3.93</b> |
| <b>49</b> | 0.09 | 0.03 | 0.07 | 1.92 | 0.19 | 0.04 | 0.32 | 0.80 | 2.61 | 0.54 | 0.02 | 0.04 |      | 0.17 | 0.39 | 0.02 | 0.07 | 0.05 | 0.09 | 0.08 | <b>7.52</b> |
| <b>50</b> | 0.12 | 0.03 | 0.09 | 1.71 | 0.18 | 0.04 | 0.41 | 0.80 | 1.48 | 0.69 | 0.01 | 0.03 |      | 0.35 | 0.35 | 0.02 | 0.04 | 0.05 | 0.07 | 0.06 | <b>6.53</b> |
| <b>51</b> | 0.09 | 0.02 | 0.05 | 1.37 | 0.10 | 0.03 | 0.31 | 0.70 | 1.24 | 0.62 | 0.01 | 0.02 |      | 0.15 | 0.36 | 0.02 | 0.04 | 0.04 | 0.07 | 0.10 | <b>5.36</b> |
| <b>52</b> | 0.16 | 0.02 | 0.06 | 1.65 | 0.26 | 0.03 | 0.30 | 0.64 | 1.66 | 0.76 | 0.01 | 0.03 | 0.06 | 0.12 | 0.36 | 0.11 | 0.03 | 0.06 | 0.08 | 0.07 | <b>6.47</b> |
| <b>53</b> | 0.21 | 0.04 | 0.06 | 1.97 | 0.43 | 0.05 | 0.26 | 0.76 | 1.99 | 0.66 | 0.02 | 0.02 | 0.08 | 0.23 | 0.39 | 0.18 | 0.06 | 0.07 | 0.07 | 0.15 | <b>7.69</b> |
| <b>54</b> | 0.10 | 0.02 | 0.06 | 0.96 | 0.14 | 0.02 | 0.24 | 0.45 | 0.90 | 0.68 | 0.03 | 0.01 | 0.06 | 0.19 | 0.59 | 0.11 | 0.04 | 0.04 | 0.06 | 0.08 | <b>4.80</b> |
| <b>55</b> | 0.09 | 0.02 | 0.08 | 1.11 | 0.10 | 0.02 | 0.28 | 0.47 | 0.97 | 0.65 | 0.01 | 0.01 | 0.11 | 0.19 | 0.39 | 0.16 | 0.05 | 0.05 | 0.07 | 0.10 | <b>4.93</b> |
| <b>56</b> | 0.11 | 0.02 | 0.05 | 0.92 | 0.08 | 0.02 | 0.21 | 0.41 | 0.80 | 0.53 | 0.01 | 0.01 | 0.07 | 0.13 | 0.37 | 0.13 | 0.04 | 0.04 | 0.05 | 0.06 | <b>4.04</b> |
| <b>57</b> | 0.09 | 0.02 | 0.09 | 1.03 | 0.10 | 0.02 | 0.38 | 0.54 | 1.04 | 0.76 | 0.01 | 0.02 | 0.06 | 0.17 | 0.65 | 0.12 | 0.05 | 0.05 | 0.07 | 0.10 | <b>5.38</b> |
| <b>58</b> | 0.19 | 0.03 | 0.09 | 2.24 | 0.34 | 0.03 | 0.46 | 0.72 | 1.95 | 0.74 | 0.01 | 0.02 | 0.07 | 0.19 | 0.45 | 0.16 | 0.04 | 0.06 | 0.09 | 0.12 | <b>8.01</b> |
| <b>59</b> | 0.08 | 0.02 | 0.08 | 0.81 | 0.08 | 0.02 | 0.25 | 0.34 | 0.58 | 0.46 | 0.01 | 0.01 | 0.07 | 0.08 | 0.36 | 0.10 | 0.03 | 0.03 | 0.06 | 0.05 | <b>3.52</b> |
| <b>60</b> | 0.15 | 0.03 | 0.06 | 1.23 | 0.10 | 0.03 | 0.25 | 0.45 | 1.15 | 0.41 | 0.01 | 0.01 | 0.06 | 0.10 | 0.32 | 0.13 | 0.04 | 0.05 | 0.06 | 0.07 | <b>4.72</b> |
| <b>61</b> | 0.05 | 0.01 | 0.03 | 0.48 | 0.04 | 0.01 | 0.13 | 0.25 | 0.43 | 0.19 | 0.01 | 0.01 | 0.07 | 0.07 | 0.44 | 0.06 | 0.02 | 0.02 | 0.03 | 0.03 | <b>2.37</b> |
| <b>62</b> | 0.06 | 0.01 | 0.03 | 0.85 | 0.14 | 0.01 | 0.16 | 0.35 | 0.73 | 0.20 | 0.01 | 0.01 |      | 0.09 | 0.36 | 0.07 | 0.01 | 0.03 | 0.05 | 0.03 | <b>3.19</b> |

**Table S2.** 16:0 FA in the blood of hyperlipidemic patients and normolipidemic controls following stratification according to PNPLA3 I148M and ABCB1 G2677T genotypes.

| Genotype              | Group                        |                              | <i>p</i> <sup>1</sup> |
|-----------------------|------------------------------|------------------------------|-----------------------|
|                       | Normolipidemics ( <i>n</i> ) | Hyperlipidemics ( <i>n</i> ) |                       |
| <b>PNPLA3 I148M</b>   |                              |                              |                       |
| CC                    | 1.45 ± 0.595 (21)            | 1.84 ± 0.781 (26)            | 0.053                 |
| CG                    | 1.33 ± 0.426 (15)            | 1.60 ± 0.401 (27)            | 0.052                 |
| GG                    | 1.13 ± 0.290 (4)             | 2.52 ± 0.705 (8)             | 0.001                 |
| <i>p</i> <sup>2</sup> | 0.564                        | 0.016                        |                       |
| <b>ABCB1 G2677T</b>   |                              |                              |                       |
| GG                    | 1.47 ± 0.506 (15)            | 1.64 ± 0.522 (26)            | 0.297                 |
| GT                    | 1.40 ± 0.598 (16)            | 1.85 ± 0.626 (22)            | 0.033                 |
| TT                    | 1.20 ± 0.186 (11)            | 2.09 ± 0.939 (14)            | 0.004                 |
| <i>p</i> <sup>2</sup> | 0.485                        | 0.071                        |                       |

<sup>1</sup> Student t-test; <sup>2</sup> ANCOVA with BMI, HbA1c as covariates.

**Table S3.** 18:0 FA in the blood of hyperlipidemic patients and normolipidemic controls following stratification according to PNPLA3 I148M and ABCB1 G2677T genotypes.

| Genotype              | Group                        |                              | <i>p</i> <sup>1</sup> |
|-----------------------|------------------------------|------------------------------|-----------------------|
|                       | Normolipidemics ( <i>n</i> ) | Hyperlipidemics ( <i>n</i> ) |                       |
| <b>PNPLA3 I148M</b>   |                              |                              |                       |
| CC                    | 0.94 ± 0.339 (21)            | 1.01 ± 0.297 (26)            | 0.457                 |
| CG                    | 0.88 ± 0.291 (15)            | 0.89 ± 0.185 (27)            | 0.960                 |
| GG                    | 0.72 ± 0.213 (4)             | 1.40 ± 0.277 (8)             | 0.002                 |
| <i>p</i> <sup>2</sup> | 0.488                        | <0.001                       |                       |
| <b>ABCB1 G2677T</b>   |                              |                              |                       |
| GG                    | 0.91 ± 0.273 (15)            | 0.98 ± 0.276 (26)            | 0.417                 |
| GT                    | 0.94 ± 0.399 (16)            | 1.02 ± 0.309 (22)            | 0.492                 |
| TT                    | 0.83 ± 0.188 (11)            | 1.02 ± 0.326 (14)            | 0.109                 |
| <i>p</i> <sup>2</sup> | 0.749                        | 0.776                        |                       |

<sup>1</sup> Student t-test; <sup>2</sup> ANCOVA with BMI, HbA1c as covariates.

**Table S4.** 18:1 FA in the blood of hyperlipidemic patients and normolipidemic controls following stratification according to PNPLA3 I148M and ABCB1 G2677T genotypes.

| Genotype              | Group                        |                              |                       |
|-----------------------|------------------------------|------------------------------|-----------------------|
|                       | Normolipidemics ( <i>n</i> ) | Hyperlipidemics ( <i>n</i> ) | <i>p</i> <sup>1</sup> |
| <b>PNPLA3 I148M</b>   |                              |                              |                       |
| CC                    | 1.33 ± 0.660 (21)            | 1.87 ± 0.831 (26)            | 0.019                 |
| CG                    | 1.27 ± 0.326 (15)            | 1.65 ± 0.515 (27)            | 0.015                 |
| GG                    | 1.08 ± 0.244 (4)             | 1.40 ± 0.277 (8)             | 0.023                 |
| <i>p</i> <sup>2</sup> | 0.707                        | 0.009                        |                       |
| <b>ABCB1 G2677T</b>   |                              |                              |                       |
| GG                    | 1.41 ± 0.602 (15)            | 1.65 ± 0.551 (26)            | 0.210                 |
| GT                    | 1.37 ± 0.552 (16)            | 1.98 ± 0.961 (22)            | 0.030                 |
| TT                    | 1.05 ± 0.171 (11)            | 2.24 ± 1.064 (14)            | 0.001                 |
| <i>p</i> <sup>2</sup> | 0.190                        | 0.030                        |                       |

<sup>1</sup> Student t-test; <sup>2</sup> ANCOVA with BMI, HbA1c as covariates.

**Table S5.** 18:2 FA in the blood of hyperlipidemic patients and normolipidemic controls following stratification according to PNPLA3 I148M and ABCB1 G2677T genotypes.

| Genotype              | Group                        |                              |                       |
|-----------------------|------------------------------|------------------------------|-----------------------|
|                       | Normolipidemics ( <i>n</i> ) | Hyperlipidemics ( <i>n</i> ) | <i>p</i> <sup>1</sup> |
| <b>PNPLA3 I148M</b>   |                              |                              |                       |
| CC                    | 0.64 ± 0.204 (21)            | 0.91 ± 0.382 (26)            | 0.004                 |
| CG                    | 0.76 ± 0.315 (15)            | 0.82 ± 0.281 (27)            | 0.533                 |
| GG                    | 0.55 ± 0.198 (4)             | 1.26 ± 0.268 (8)             | 0.001                 |
| <i>p</i> <sup>2</sup> | 0.233                        | 0.028                        |                       |
| <b>ABCB1 G2677T</b>   |                              |                              |                       |
| GG                    | 0.67 ± 0.173 (15)            | 0.081 ± 0.335 (26)           | 0.091                 |
| GT                    | 0.76 ± 0.350 (16)            | 0.95 ± 0.281 (22)            | 0.064                 |
| TT                    | 0.59 ± 0.125 (11)            | 1.03 ± 0.438 (14)            | 0.002                 |
| <i>p</i> <sup>2</sup> | 0.249                        | 0.200                        |                       |

<sup>1</sup> Student t-test; <sup>2</sup> ANCOVA with BMI, HbA1c as covariates.

**Table S6.** 20:4 FA in the blood of hyperlipidemic patients and normolipidemic controls following stratification according to PNPLA3 I148M and ABCB1 G2677T genotypes.

| Genotype              | Group                        |                              | <i>p</i> <sup>1</sup> |
|-----------------------|------------------------------|------------------------------|-----------------------|
|                       | Normolipidemics ( <i>n</i> ) | Hyperlipidemics ( <i>n</i> ) |                       |
| <b>PNPLA3 I148M</b>   |                              |                              |                       |
| CC                    | 0.67 ± 0.213 (21)            | 0.70 ± 0.331 (26)            | 0.767                 |
| CG                    | 0.80 ± 0.255 (15)            | 0.59 ± 0.303 (27)            | 0.030                 |
| GG                    | 0.76 ± 0.087 (4)             | 0.71 ± 0.250 (8)             | 0.693                 |
| <i>p</i> <sup>2</sup> | 0.289                        | 0.239                        |                       |
| <b>ABCB1 G2677T</b>   |                              |                              |                       |
| GG                    | 0.71 ± 0.221 (15)            | 0.58 ± 0.271 (26)            | 0.117                 |
| GT                    | 0.82 ± 0.197 (16)            | 0.63 ± 0.170 (22)            | 0.003                 |
| TT                    | 0.64 ± 0.256 (11)            | 0.82 ± 0.459 (14)            | 0.259                 |
| <i>p</i> <sup>2</sup> | 0.068                        | 0.085                        |                       |

<sup>1</sup> Student t-test; <sup>2</sup> ANCOVA with BMI, HbA1c as covariates.

**Table S7.** 20:5 FA in the blood of hyperlipidemic patients and normolipidemic controls following stratification according to PNPLA3 I148M and ABCB1 G2677T genotypes.

| Genotype              | Group                        |                              | <i>p</i> <sup>1</sup> |
|-----------------------|------------------------------|------------------------------|-----------------------|
|                       | Normolipidemics ( <i>n</i> ) | Hyperlipidemics ( <i>n</i> ) |                       |
| <b>PNPLA3 I148M</b>   |                              |                              |                       |
| CC                    | 0.40 ± 0.271 (21)            | 0.54 ± 0.152 (26)            | 0.048                 |
| CG                    | 0.48 ± 0.190 (15)            | 0.48 ± 0.106 (27)            | 0.912                 |
| GG                    | 0.50 ± 0.137 (5)             | 0.22 ± 0.184 (8)             | 0.023                 |
| <i>p</i> <sup>2</sup> | 0.510                        | < 0.001                      |                       |
| <b>ABCB1 G2677T</b>   |                              |                              |                       |
| GG                    | 0.45 ± 0.266 (15)            | 0.44 ± 0.138 (26)            | 0.821                 |
| GT                    | 0.42 ± 0.229 (16)            | 0.43 ± 0.183 (22)            | 0.866                 |
| TT                    | 0.43 ± 0.231 (11)            | 0.59 ± 0.155 (14)            | 0.056                 |
| <i>p</i> <sup>2</sup> | 0.936                        | 0.005                        |                       |

<sup>1</sup> Student t-test; <sup>2</sup> ANCOVA with BMI, HbA1c as covariates.

**Table S8.** Total cholesterol, triglycerides and glycated hemoglobin in the blood of hyperlipidemic patients and normolipidemic controls following stratification according to PNPLA3 I148M and ABCB1 G2677T genotypes.

| PNPLA3 I148M          | Normolipidemics ( <i>n</i> ) |              | Hyperlipidemics ( <i>n</i> ) |              |              | <i>p</i> <sup>1</sup> | <i>p</i> <sup>2</sup> |
|-----------------------|------------------------------|--------------|------------------------------|--------------|--------------|-----------------------|-----------------------|
|                       | TC (mmol/L)                  | TG (mmol/L)  | TC (mmol/L)                  | TG (mmol/L)  | HbA1c (%)    |                       |                       |
| CC                    | 4.45 ± 0.677 (21)            | 1.13 ± 0.478 | 6.71 ± 1.015 (26)            | 2.46 ± 0.156 | 6.06 ± 1.126 | < 0.001               | < 0.001               |
| CG                    | 5.13 ± 0.441 (15)            | 1.08 ± 0.381 | 6.28 ± 0.938 (27)            | 2.25 ± 0.856 | 5.37 ± 0.639 | < 0.001               | < 0.001               |
| GG                    | 4.89 ± 1.200 (5)             | 1.47 ± 0.504 | 6.94 ± 0.830 (8)             | 2.60 ± 1.311 | 5.76 ± 0.612 | 0.010                 | 0.192                 |
| <i>p</i> <sup>3</sup> | 0.011                        | 0.352        | 0.131                        | 0.721        | 0.023        |                       |                       |
| <b>ABCB1 G2677T</b>   |                              |              |                              |              |              |                       |                       |
| GG                    | 4.65 ± 0.831 (15)            | 1.15 ± 0.393 | 6.29 ± 1.072 (26)            | 2.29 ± 0.743 | 5.97 ± 1.012 | < 0.001               | < 0.001               |
| GT                    | 4.74 ± 0.711 (16)            | 1.18 ± 0.546 | 6.50 ± 0.806 (22)            | 2.50 ± 0.869 | 5.69 ± 0.831 | < 0.001               | < 0.001               |
| TT                    | 4.93 ± 0.441 (11)            | 1.05 ± 0.336 | 7.15 ± 0.799 (14)            | 2.41 ± 1.651 | 5.37 ± 0.843 | < 0.001               | 0.009                 |
| <i>p</i> <sup>3</sup> | 0.405                        | 0.841        | 0.022                        | 0.784        | 0.153        |                       |                       |

<sup>1</sup> Student t-test, TC normolipidemics vs. hyperlipidemics; <sup>2</sup> Student t-test, TG normolipidemics vs. hyperlipidemics; <sup>3</sup> ANCOVA with BMI, HbA1c as covariates.

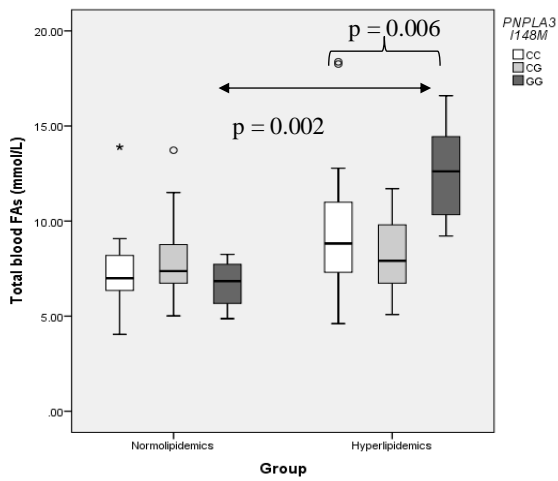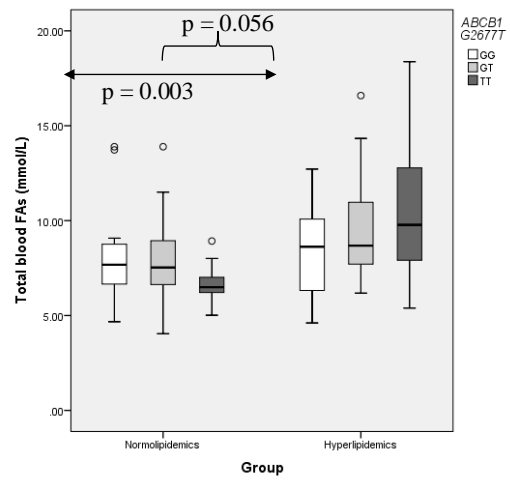

**Figure S1.** Comparison of total blood fatty acid concentrations in the three genotypes of the *PNPLA3* I148M (left) and the *ABCB1* G2677T (right) polymorphism, in normolipidemic controls and hyperlipidemic patients .
